# Supplementary material for: Universal Single-Probe RT-PCR Assay for Diagnosis of Dengue Virus Infections
Source: PubMed Central journal article supplement (PMC4270494; doi:10.1371/journal.pntd.0003416), 2014-12-18

Fig. S2A. DENV1

Geographic distribution

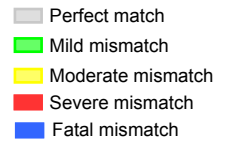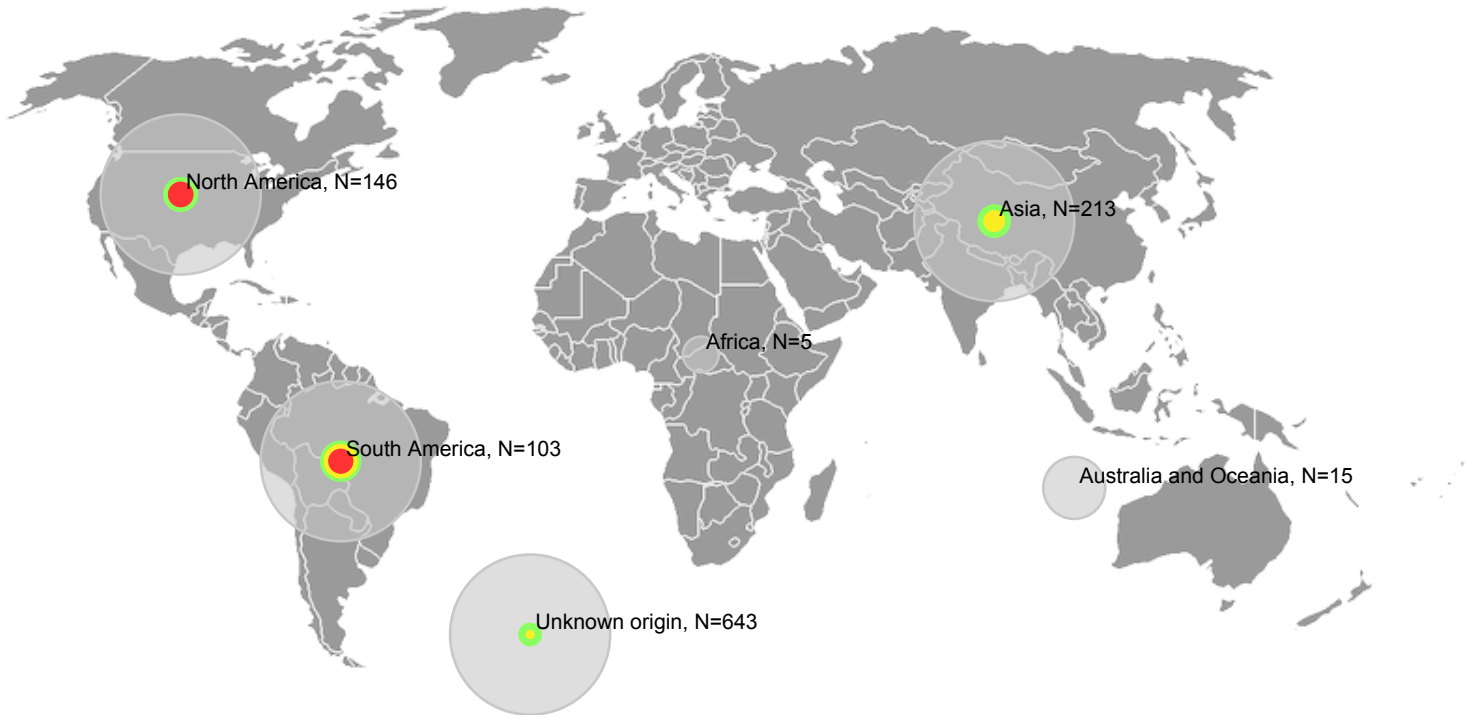

All sequences

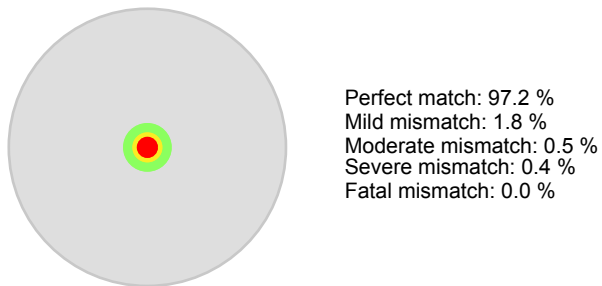

Collection dates and mismatches

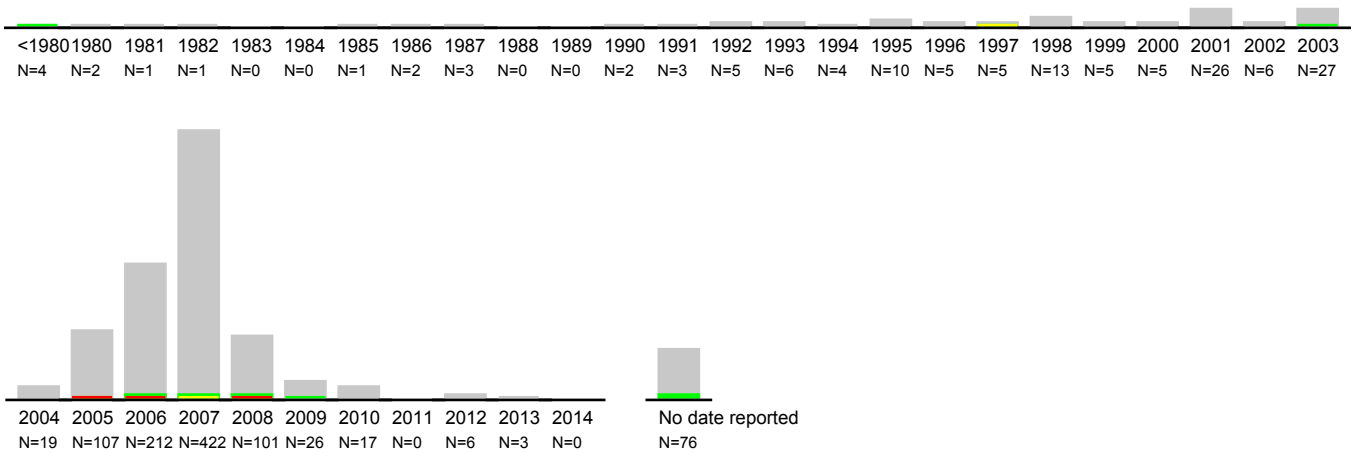

Fig. S2B. DENV2

Geographic distribution

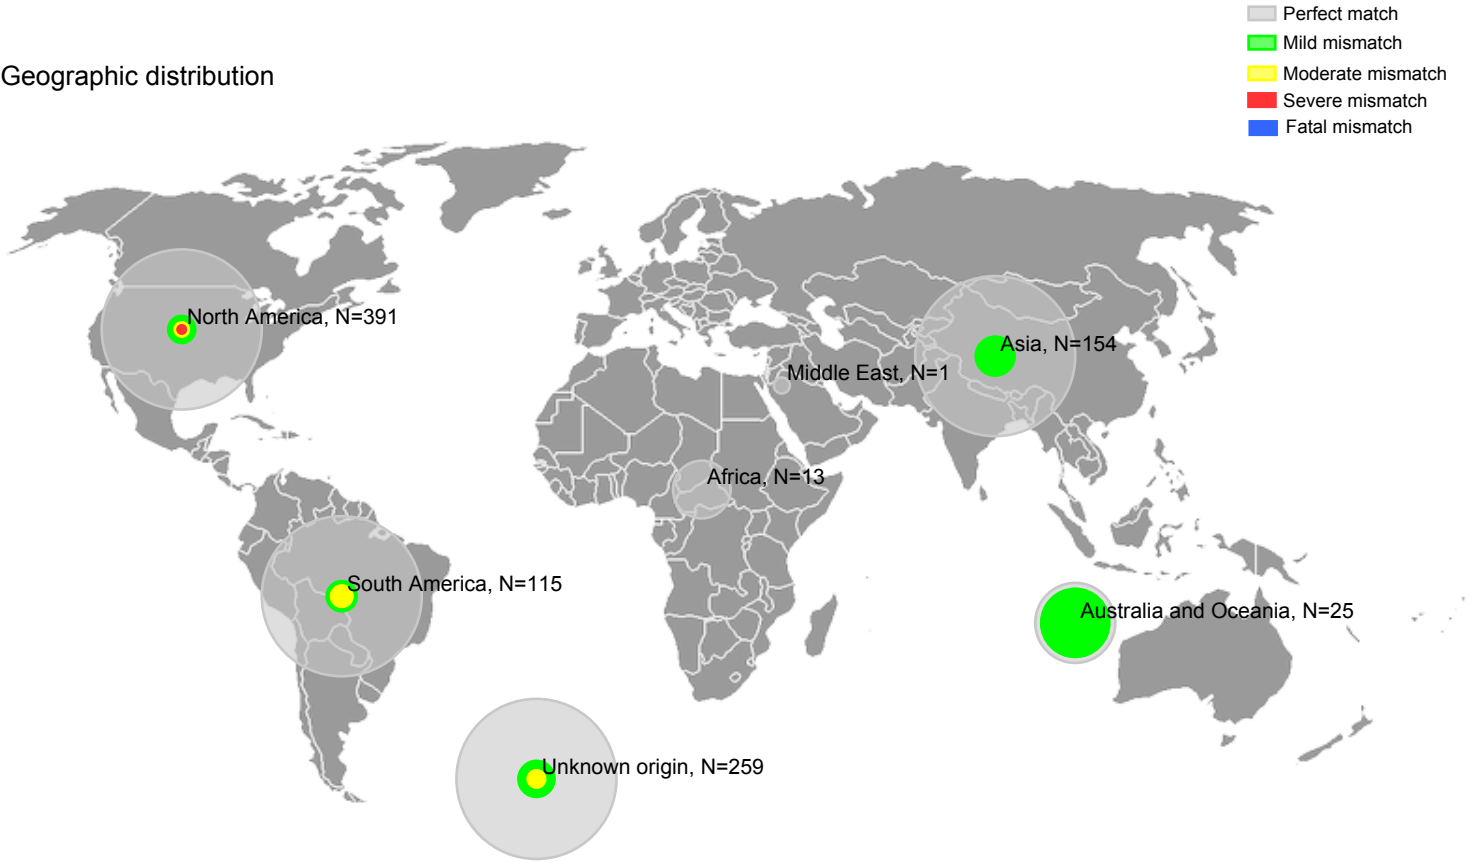

All sequences

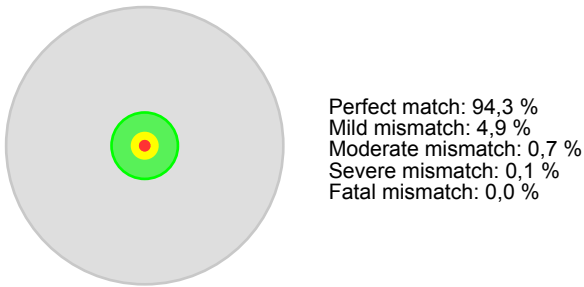

Collection dates and mismatches

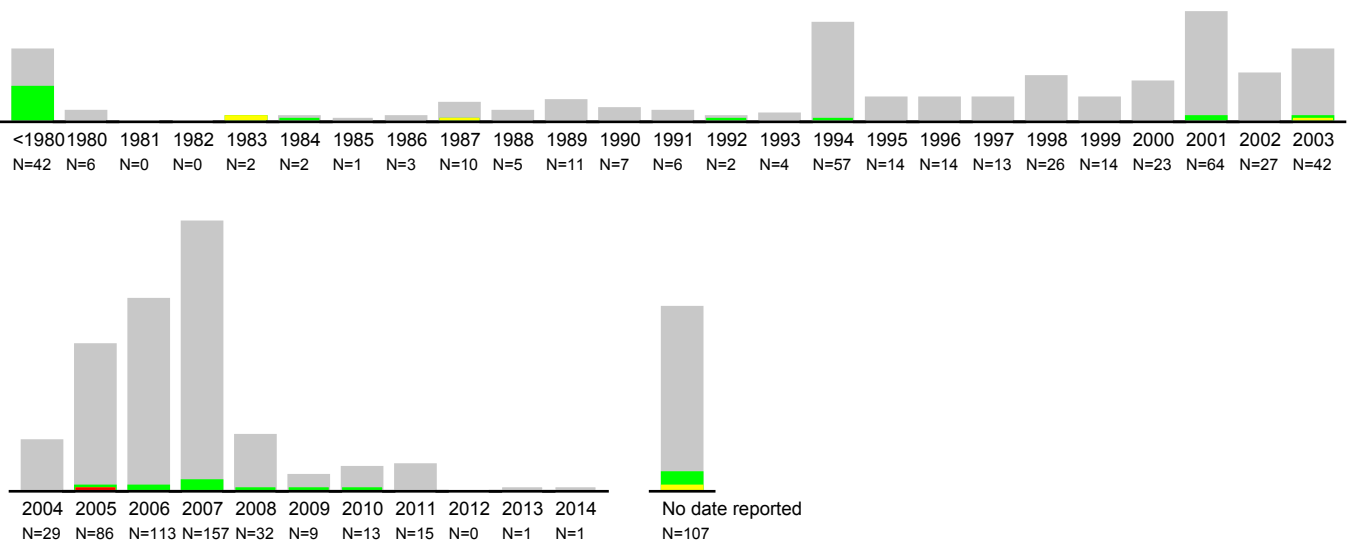

Fig. S2C. DENV3

Geographic distribution

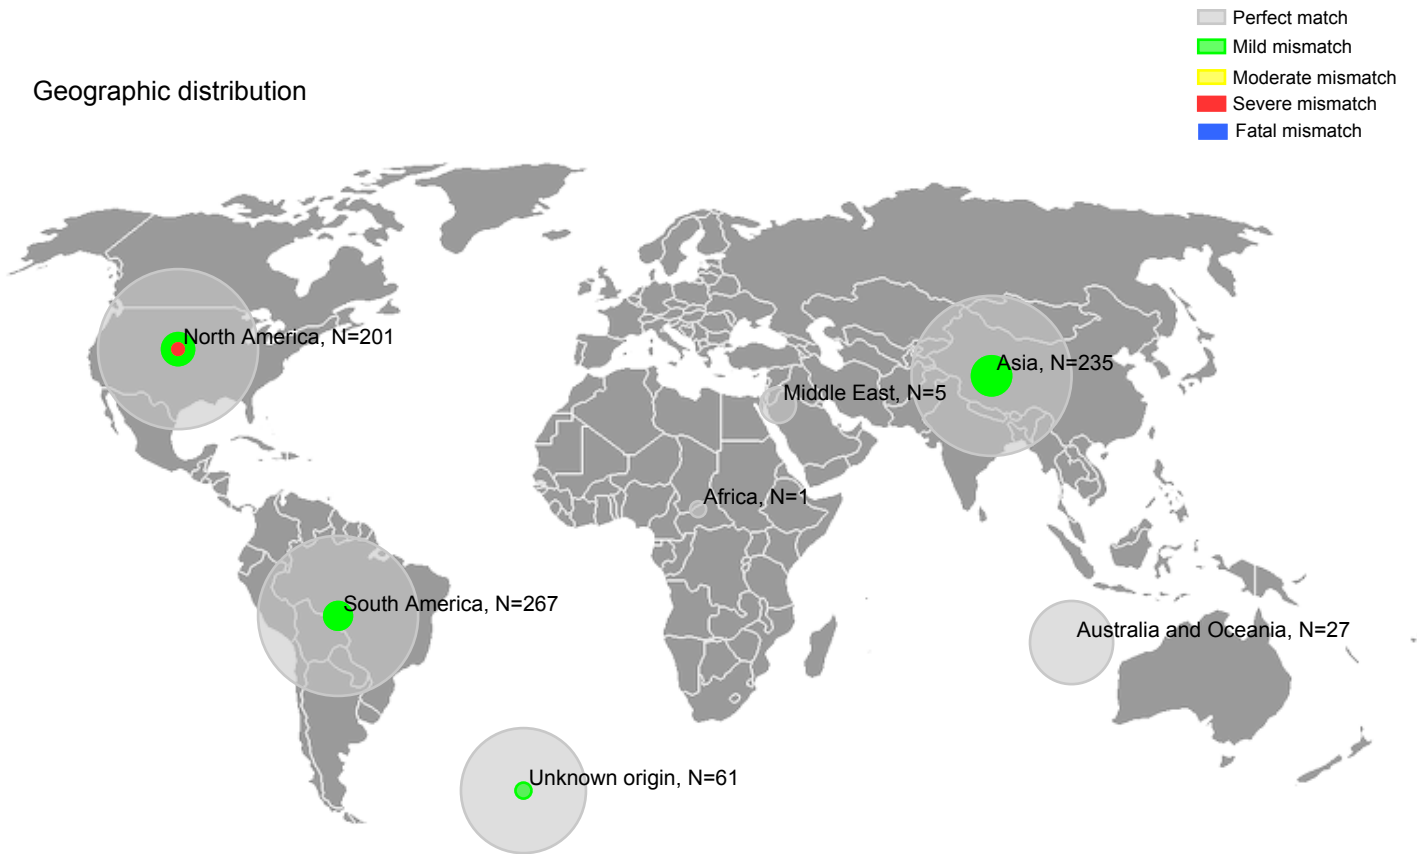

All sequences

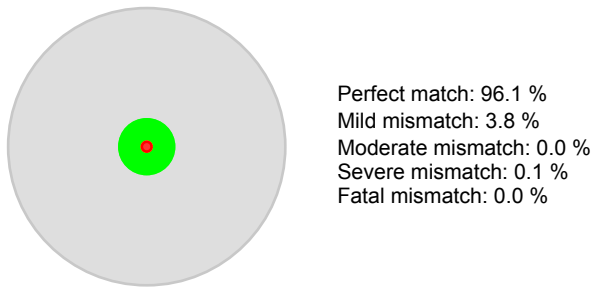

Collection dates and mismatches

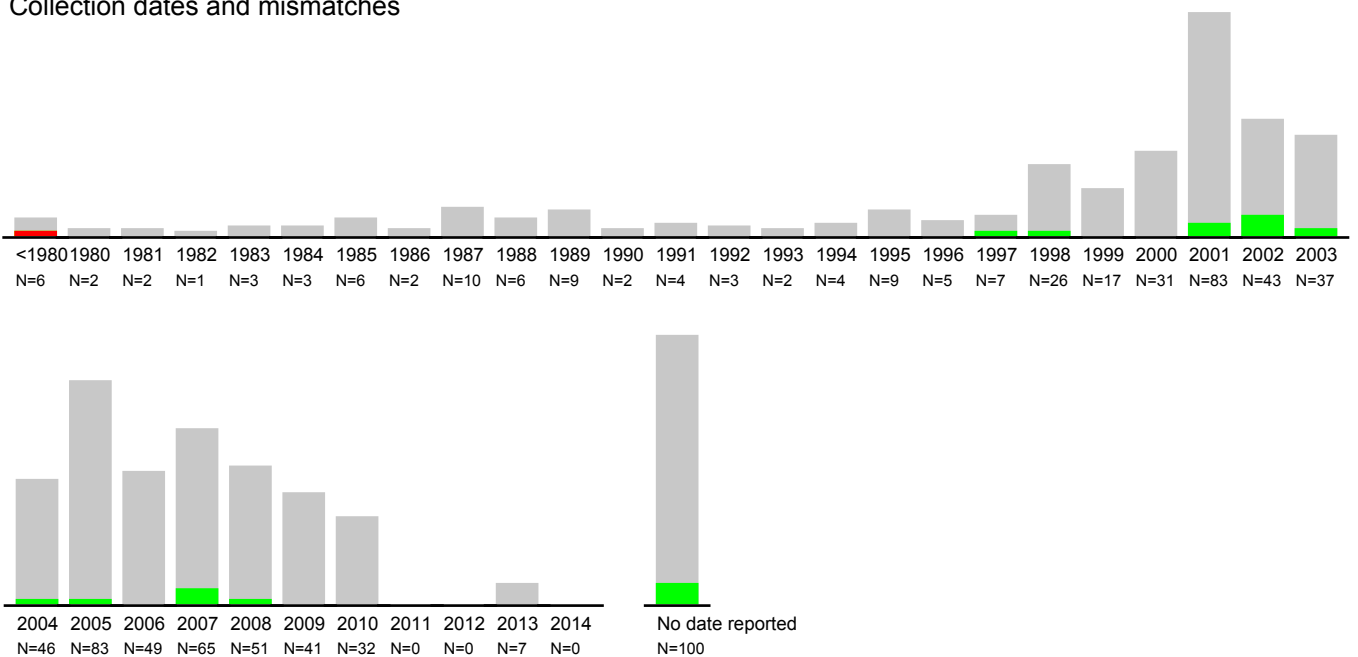

Fig. S2D. DENV4

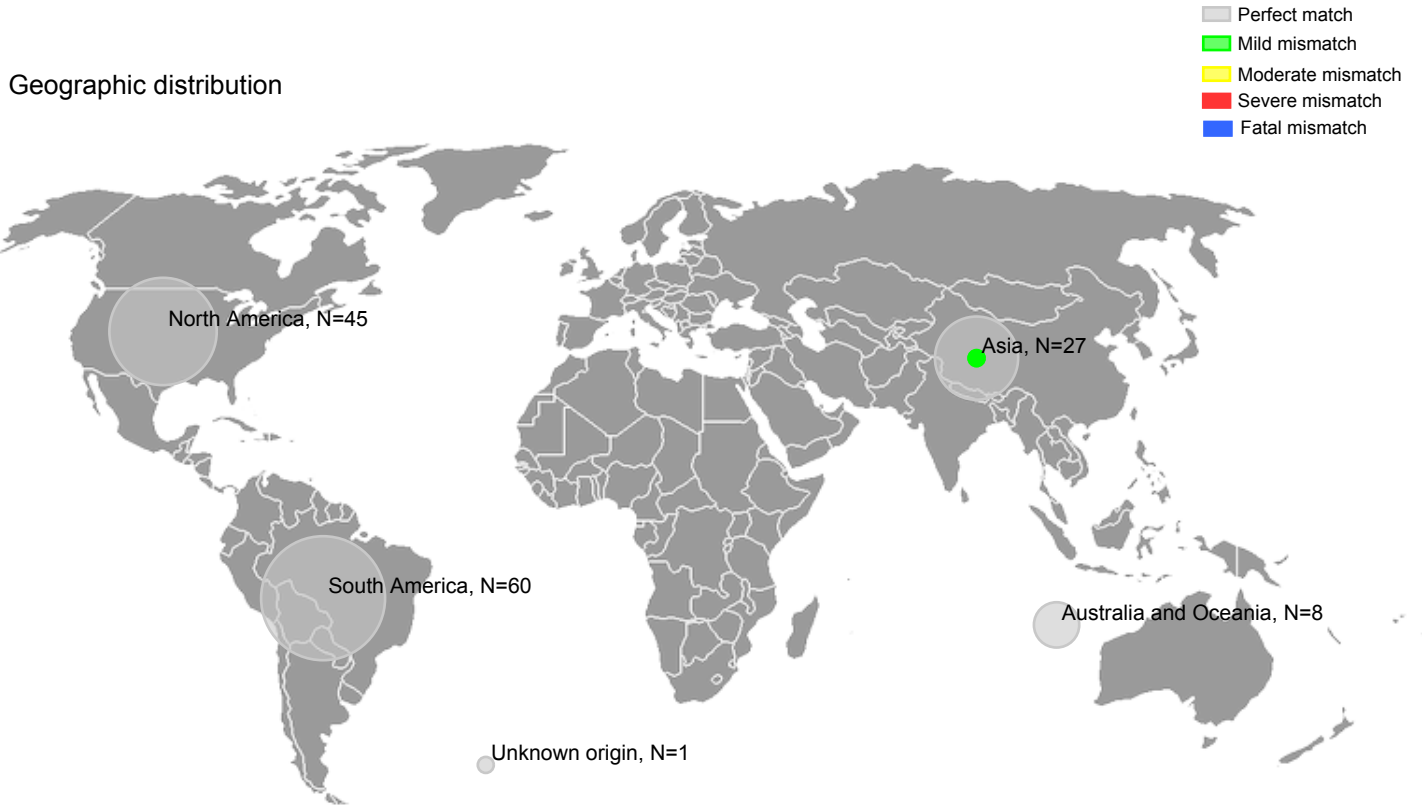

All sequences

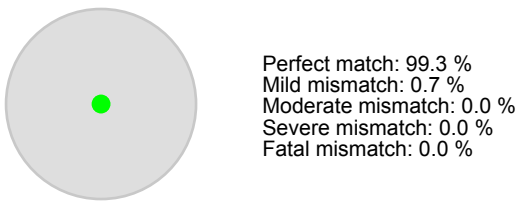

Collection dates and mismatches

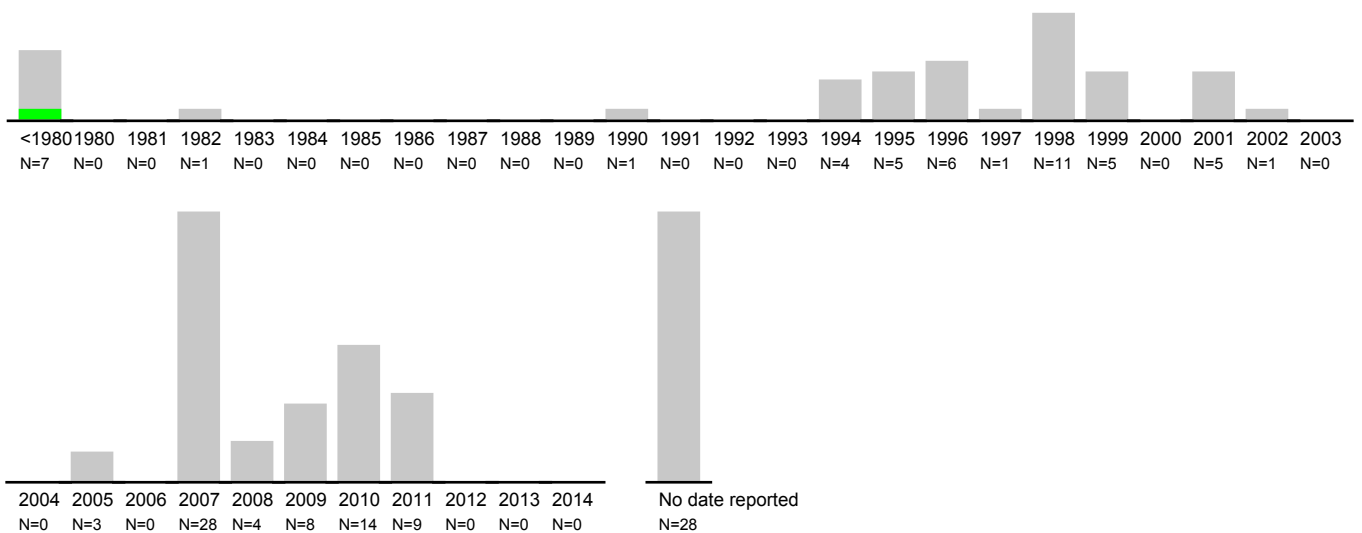

Supplement: pntd.0003416.s002.pdf [file pntd.0003416.s002.pdf]
