# Supplementary material for: Universal Single-Probe RT-PCR Assay for Diagnosis of Dengue Virus Infections
Source: PubMed Central journal article supplement (PMC4270494; doi:10.1371/journal.pntd.0003416), 2014-12-18

General example

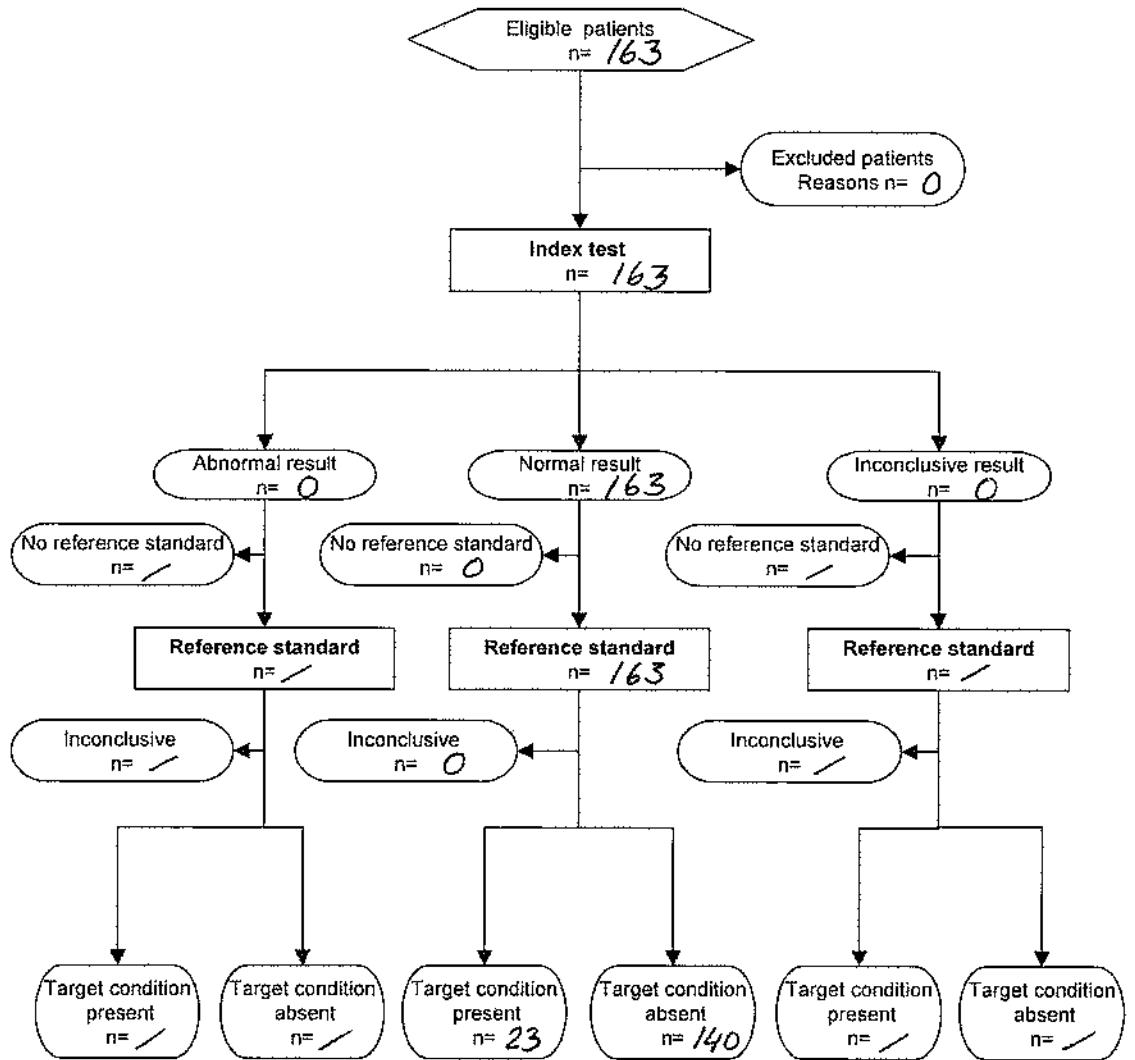

Supplement: pntd.0003416.s007.pdf [file pntd.0003416.s007.pdf]
